# Supplementary material for: PD-L1 expression from surgically resected lung tumors predictive of early progression in patients previously treated with targeted therapy for initially unresectable non-small cell lung cancer
Source: PubMed Central journal article supplement — Transl Lung Cancer Res. 2024 Jul 25;13(7):1463–80. doi: 10.21037/tlcr-24-215 (PMC11304157; doi:10.21037/tlcr-24-215), 2024-07-25
Supplement: tlcr-13-07-1463-dss.pdf [file tlcr-13-07-1463-dss.pdf]

## Data Sharing Statement

|                     |                                                                                                                                                     |                                                                                                                               |
|---------------------|-----------------------------------------------------------------------------------------------------------------------------------------------------|-------------------------------------------------------------------------------------------------------------------------------|
| <b>Article Info</b> | <a href="https://dx.doi.org/10.21037/tlcr-24-215">https://dx.doi.org/10.21037/tlcr-24-215</a>                                                       |                                                                                                                               |
| <b>Item</b>         | <b>Question</b>                                                                                                                                     | <b>Authors' Response<br/>(place "-" if not applicable)</b>                                                                    |
| 1                   | Would you like to share data collected for your study to others?                                                                                    | No                                                                                                                            |
| 2                   | If not, would you like to share the reason for your decision?                                                                                       | Access to Clinical Database Warehouse is only restricted to specific researchers who were authorized to use by CDW committee. |
| 3                   | What data in particular will be shared?                                                                                                             | -                                                                                                                             |
| 4                   | Any other documents will be shared? Such as study protocol, statistical analysis plan, informed consent form, clinical study report, analytic code. | None.                                                                                                                         |
| 5                   | When will data availability begin?                                                                                                                  | -                                                                                                                             |
| 6                   | When will data availability end?                                                                                                                    | -                                                                                                                             |
| 7                   | To whom will you share the data?                                                                                                                    | -                                                                                                                             |
| 8                   | For what type of analysis or purpose?                                                                                                               | -                                                                                                                             |
| 9                   | How or where can the data/documents be obtained?                                                                                                    | -                                                                                                                             |
| 10                  | Any other restrictions?                                                                                                                             | -                                                                                                                             |
