# Supplementary material for: PD-L1 expression from surgically resected lung tumors predictive of early progression in patients previously treated with targeted therapy for initially unresectable non-small cell lung cancer
Source: PubMed Central journal article supplement — Transl Lung Cancer Res. 2024 Jul 25;13(7):1463–80. doi: 10.21037/tlcr-24-215 (PMC11304157; doi:10.21037/tlcr-24-215), 2024-07-25
Supplement: tlcr-13-07-1463-supplementary.pdf [file tlcr-13-07-1463-supplementary.pdf]

## Supplementary

**Table S1** Prevalence of major mutation detected by NGS performed on resected samples in 22 patients

| Genetic alterations   | Value (n=22), n (%) |
|-----------------------|---------------------|
| EGFR exon 19 deletion | 9 (40.9)            |
| EGFR L858R            | 6 (27.3)            |
| TP53                  | 11 (50.0)           |
| T790M mutation        | 5 (22.7)            |
| EML4-ALK fusion       | 3 (13.6)            |
| MET-amplification     | 3 (13.6)            |

NGS, next-generation sequencing; EGFR, epidermal growth factor receptor; EML4, echinoderm microtubule-associated protein-like 4; ALK, anaplastic lymphoma kinase; MET, mesenchymal-epithelial transition factor.

**Table S2** Comparison of post-resection PFS and OS between groups stratified by tumor differentiation level of resection sample

| Clinical outcome               | Well and moderate differentiation | Poor differentiation | P value |
|--------------------------------|-----------------------------------|----------------------|---------|
| 6-month PFS rate, % (n/total)  | 85.7 (18/21)                      | 56.3 (9/16)          | 0.046   |
| 12-month PFS rate, % (n/total) | 75.0 (15/20)                      | 43.8 (7/16)          | 0.056   |
| 18-month PFS rate, % (n/total) | 57.1 (8/14)                       | 30.8 (4/13)          | 0.168   |
| 1-year OS rate, % (n/total)    | 100.0 (18/18)                     | 85.7 (12/14)         | 0.098   |
| 2-year OS rate, % (n/total)    | 100.0 (8/8)                       | 55.6 (5/9)           | 0.031   |

PFS, progression-free survival; OS, overall survival.

**Table S3** Comparison of post-resection PFS and OS between groups stratified by resection status (R0 vs. R1–2)

| Clinical outcome               | R0           | R1–2        | P value |
|--------------------------------|--------------|-------------|---------|
| 6-month PFS rate, % (n/total)  | 76.7 (23/30) | 40.0 (2/5)  | 0.093   |
| 12-month PFS rate, % (n/total) | 70.0 (21/30) | 25.0 (1/4)  | 0.077   |
| 18-month PFS rate, % (n/total) | 57.1 (12/21) | 25.0 (1/4)  | 0.238   |
| 1-year OS rate, % (n/total)    | 92.9 (26/28) | 100.0 (3/3) | 0.632   |
| 2-year OS rate, % (n/total)    | 78.6 (11/14) | 50.0 (1/2)  | 0.383   |

R0, resection for cure or complete remission; R1, microscopic residual tumor; R2, macroscopic residual tumor; PFS, progression-free survival; OS, overall survival.

**Table S4** Comparison of post-resection PFS and OS between groups stratified by T790M mutation from resection sample among EGFR mutated patients

| Clinical outcome               | T790M mutation negative | T790M mutated | P value |
|--------------------------------|-------------------------|---------------|---------|
| 6-month PFS rate, % (n/total)  | 60.0 (15/25)            | 90.9 (10/11)  | 0.064   |
| 12-month PFS rate, % (n/total) | 48.0 (12/25)            | 90.0 (9/10)   | 0.022   |
| 18-month PFS rate, % (n/total) | 35.7 (5/14)             | 87.5 (7/8)    | 0.003   |
| 1-year OS rate, % (n/total)    | 95.5 (21/22)            | 100.0 (9/9)   | 0.516   |
| 2-year OS rate, % (n/total)    | 70.0 (7/10)             | 100.0 (7/7)   | 0.110   |

PFS, progression-free survival; OS, overall survival; EGFR, epidermal growth factor receptor.

**Table S5** Comparison of post-resection PFS and OS between groups stratified by ECOG score before resection

| Clinical outcome               | ECOG 0        | ECOG 1      | ECOG 2     | P value |
|--------------------------------|---------------|-------------|------------|---------|
| 6-month PFS rate, % (n/total)  | 75.0 (21/28)  | 60.0 (6/10) | 50.0 (1/2) | 0.551   |
| 12-month PFS rate, % (n/total) | 71.4 (20/28)  | 22.2 (2/9)  | 50.0 (1/2) | 0.032   |
| 18-month PFS rate, % (n/total) | 50.0 (10/20)  | 25.0 (2/8)  | 50.0 (1/2) | 0.474   |
| 1-year OS rate, % (n/total)    | 100.0 (25/25) | 87.5 (7/8)  | 50.0 (1/2) | 0.009   |
| 2-year OS rate, % (n/total)    | 100.0 (11/11) | 33.3 (2/6)  | 50.0 (1/2) | 0.008   |

PFS, progression-free survival; OS, overall survival; ECOG, Eastern Cooperative Oncology Group.

**Table S6** Comparison of post-resection PFS and OS between groups stratified by degree of pleural invasion

| Clinical outcome               | PL0          | PL1         | PL2         | PL3        | P value |
|--------------------------------|--------------|-------------|-------------|------------|---------|
| 6-month PFS rate, % (n/total)  | 84.0 (21/25) | 66.7 (4/6)  | 40.0 (2/5)  | 0.0 (0/2)  | 0.025   |
| 12-month PFS rate, % (n/total) | 68.0 (17/25) | 60.0 (3/5)  | 40.0 (2/5)  | 0.0 (0/2)  | 0.214   |
| 18-month PFS rate, % (n/total) | 57.9 (11/19) | 0.0 (0/2)   | 20.0 (1/5)  | 0.0 (0/2)  | 0.121   |
| 1-year OS rate, % (n/total)    | 95.7 (22/23) | 100.0 (4/4) | 100.0 (4/4) | 50.0 (1/2) | 0.060   |
| 2-year OS rate, % (n/total)    | 84.6 (11/13) | 0.0 (0/1)   | 100.0 (3/3) | 0.0 (0/1)  | 0.042   |

PL0 indicates tumor within the subpleural lung parenchyma or invading superficially into the pleural connective tissue; PL1 indicates tumor invasion of the elastic layer of visceral pleura without reaching the visceral pleural surface; PL2 defines the tumor invasion of the visceral pleural surface; PL3 specifies tumor invasion of the parietal pleura or chest wall. PFS, progression-free survival; OS, overall survival.
